# Supplementary material
Source: PubMed Central journal article supplement (PMC3195582)
Supplement: supp_M111.253450_jbc.M111.253450-1.pdf [file supp_M111.253450_jbc.M111.253450-1.pdf]

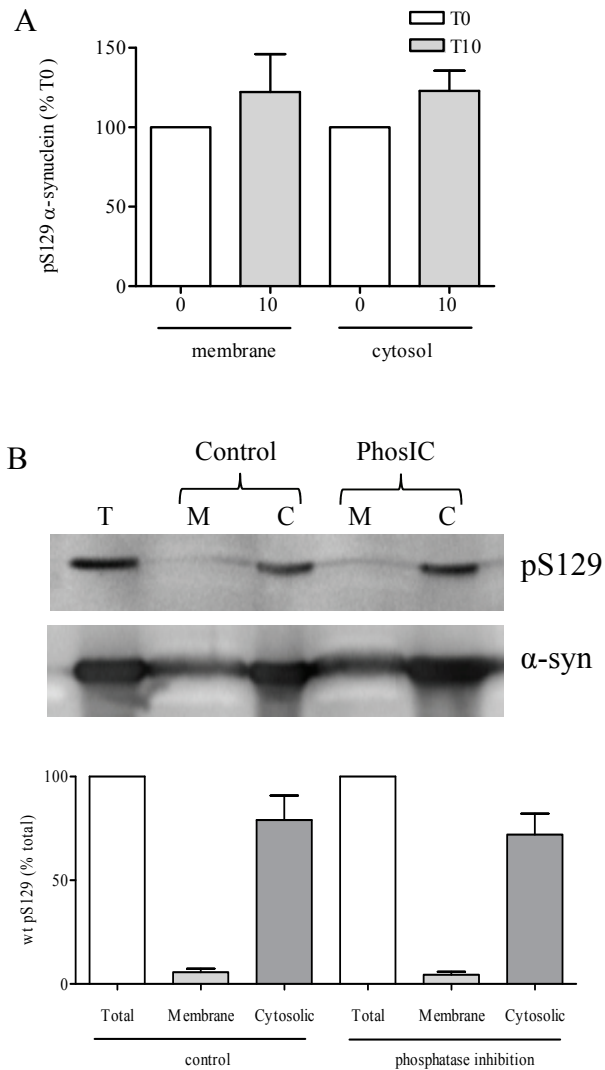

**Supplemental figure 1. Levels of membrane bound and cytosolic pS129  $\alpha$ -syn following 10 min incubation in isolation or in the presence of phosphatase inhibitors.** A) Membranes and cytosol obtained from the brains of transgenic mice expressing the human form of WT  $\alpha$ -syn were separately incubated for 10 min at 37°C (T10). The level pS129  $\alpha$ -syn was quantified by western blot and compared to that in the starting material at T=0 ( $P>0.05$ ,  $n=6$ ). B) Cytosol obtained from the brains of transgenic mice expressing the human form of WT  $\alpha$ -syn was incubated with  $\alpha$ -syn<sup>-/-</sup> synaptic membranes in the absence or presence of a phosphatase inhibitor cocktail (PhosIC) for 10 min at 37°C. Representative western blots showing the level of membrane bound (M) and cytosolic (C)  $\alpha$ -syn and pS129 are shown. Bars represent the percentage of membrane-bound and cytosolic pS129  $\alpha$ -syn relative to starting material.
